# Supplementary material for: “Only One Way Out”-Partners' Experiences and Grief Related to the Death of Their Loved One by Suicide or Physician-Assisted Dying Due to a Mental Disorder
Source: Frontiers journal article supplement (doi:10.3389/fpsyt.2022.894417), 2022-07-08
Supplement: Data_Sheet_1.pdf [file Data_Sheet_1.pdf]

## *Supplementary Material*

### **1     Supplementary Table 1**

Topic list (translated, original in Dutch)

|                                                   |                                                                                                                                                                                            |
|---------------------------------------------------|--------------------------------------------------------------------------------------------------------------------------------------------------------------------------------------------|
| <i>Interview introduction</i>                     | Information about the research project<br>Recording and confidentiality<br>Questions<br>Informed consent                                                                                   |
| <i>Introductory questions</i>                     | Reason(s) to participate<br>Name of the partner<br>General information about partner                                                                                                       |
| <i>Mental disorder of the deceased partner</i>    | First notion of metal disorder(s) and its impact<br>Good day/period of time<br>Bad day/period of time<br>Awareness/reaction social environment                                             |
| <i>Care providers</i>                             | (Professional) care related to the mental disorder(s)                                                                                                                                      |
| <i>Potential/possible death of the partner</i>    | Possible death: awareness/topic of discussion/ suicidal thoughts or tendencies<br>Thoughts on ending one's life within received (professional) care                                        |
| <i>Passing of the partner and life afterwards</i> | Way of dying, meaning for bereaved partner<br>Farewell<br>Period of time following death<br>Reactions social environment<br>Openness and sharing, support, loneliness                      |
| <i>Current situation</i>                          | Interview experience<br>Memories<br>Emotions<br>Influence loss on current life<br>Difficulties<br>Support and comfort<br>Openness social environment<br>View on death<br>Outlook on future |
| <i>Ending</i>                                     | Recap<br>Other important experiences related to the loss?                                                                                                                                  |

**2 Supplementary Table 2**

Grief disorder symptoms by mode of partner's death

|                       | Full sample |       | Mode of partner's death |      |              |       |                   |
|-----------------------|-------------|-------|-------------------------|------|--------------|-------|-------------------|
|                       | (N = 27)    |       | Suicide (N = 15)        |      | PAD (N = 12) |       | $\chi^2$ (df = 1) |
|                       | N           | %     | N                       | %    | N            | %     |                   |
| DSM-5 PCBD symptoms   | 32.59       | 10.37 | 34.57                   | 9.86 | 30.13        | 10.88 | 1.11              |
| DSM-5-TR PGD symptoms | 23.02       | 8.05  | 23.57                   | 8.47 | 22.33        | 7.80  | 0.39              |
| ICD-11 PGD symptoms   | 26.32       | 9.28  | 27.48                   | 9.32 | 24.86        | 9.42  | 0.73              |

\*  $p < .05$ \*\*  $p < .01$

### 3 Supplementary Table 3

Multiple regressions predicting grief disorder symptoms based on mode of partner's death and time since death

|                                      | Step 1 |              |           |          |                | Step 2 |              |           |          |                |                 |        |
|--------------------------------------|--------|--------------|-----------|----------|----------------|--------|--------------|-----------|----------|----------------|-----------------|--------|
|                                      | B      | 95% CI       | Beta      | F        | R <sup>2</sup> | B      | 95% CI       | Beta      | F        | R <sup>2</sup> | ΔR <sup>2</sup> | ΔF     |
| DSM-5 PCBD symptoms                  |        |              |           | 5.87 **  | 0.33           |        |              |           | 4.56 **  | 0.45           | 0.12            | 2.51   |
| Years since death                    | -2.39  | -3.94 -0.83  | -0.58 **  |          |                | -2.53  | -4.01 -1.05  | -0.61 **  |          |                |                 |        |
| Physician-assisted dying vs. suicide | -9.24  | -16.97 -1.51 | -0.45 *   |          |                | -16.71 | -28.50 -4.93 | -0.82 **  |          |                |                 |        |
| Violent death vs. non-violent death  |        |              |           |          |                | 7.68   | -2.91 18.27  | 0.34      |          |                |                 |        |
| Present at death vs. not present     |        |              |           |          |                | 14.11  | 0.84 27.37   | 0.69 *    |          |                |                 |        |
| DSM-5-TR PGD symptoms                |        |              |           | 9.71 *** | 0.45           |        |              |           | 7.78 *** | 0.59           | 0.14            | 3.68 * |
| Years since death                    | -2.32  | -3.41 -1.23  | -0.73 *** |          |                | -2.43  | -3.43 -1.43  | -0.76 *** |          |                |                 |        |
| Physician-assisted dying vs. suicide | -5.90  | -11.34 -0.46 | -0.37 *   |          |                | -11.59 | -19.55 -3.63 | -0.73 **  |          |                |                 |        |
| Violent death vs. non-violent death  |        |              |           |          |                | 6.78   | -0.37 13.94  | 0.39      |          |                |                 |        |
| Present at death vs. not present     |        |              |           |          |                | 11.36  | 2.40 20.31   | 0.71 *    |          |                |                 |        |
| ICD-11 PGD symptoms                  |        |              |           | 10.25 ** | 0.46           |        |              |           | 6.45 **  | 0.54           | 0.08            | 1.89   |
| Years since death                    | -2.67  | -3.92 -1.43  | -0.73 *** |          |                | -2.77  | -3.99 -1.56  | -0.75 *** |          |                |                 |        |
| Physician-assisted dying vs. suicide | -8.00  | -14.19 -1.80 | -0.44 *   |          |                | -13.27 | -22.95 -3.60 | -0.72 **  |          |                |                 |        |
| Violent death vs. non-violent death  |        |              |           |          |                | 5.54   | -3.15 14.23  | 0.28      |          |                |                 |        |
| Present at death vs. not present     |        |              |           |          |                | 10.03  | -0.85 20.92  | 0.55      |          |                |                 |        |

\*  $p < .05$

\*\*  $p < .01$

\*\*\*  $p < .001$
